# Supplementary material
Source: PubMed Central journal article supplement (PMC10126944)
Supplement: jamaneurol-e230841-s001.pdf [file jamaneurol-e230841-s001.pdf]

## Supplemental Online Content

McEntire CRS, Fletcher A, Toledano M, et al. Characteristics of progressive multifocal leukoencephalopathy associated with sarcoidosis without therapeutic immune suppression. *JAMA Neurol*. Published online April 24, 2023.  
doi:10.1001/jamaneurol.2023.0841

**eTable.** Characteristics of S-PML Patients in Scientific Literature 1955-2022

This supplemental material has been provided by the authors to give readers additional information about their work.

**eTable.** Characteristics of S-PML Patients in Scientific Literature 1955-2022

| Study         | Year | Patient | Age at NSO | Sex | Sites of Sarcoidosis Involvement                         | Post-PML IS   | S-PML Latency (Months) | PML Diagnosis               | PML Treatment | CD4+ (C/ $\mu$ L) | MRI Brain Findings                   | Location of Lesions | CE | mRS nadir |
|---------------|------|---------|------------|-----|----------------------------------------------------------|---------------|------------------------|-----------------------------|---------------|-------------------|--------------------------------------|---------------------|----|-----------|
| Christensen   | 1955 | 1       | 59         | M   | Lung                                                     | ND            | 0                      | Biopsy                      | ND            | ND                | ND                                   | ND                  | ND | ND        |
| Davies        | 1973 | 2       | 46         | M   | Lung, spleen, liver                                      | ND            | 0                      | ND                          | ND            | ND                | ND                                   | ND                  | ND | 6         |
| Rosenbloom    | 1983 | 3       | 59         | F   | Lung                                                     | ND            | 0                      | Biopsy                      | ND            | 820               | Left parieto-occipital               | Supra               | ND | ND        |
| Elovaara      | 1989 | 4       | 59         | F   | ND                                                       | ND            | 0                      | ND                          | ND            | ND                | ND                                   | ND                  | ND | ND        |
| Olindo        | 2000 | 5       | 63         | F   | Lung, salivary glands                                    | ND            | 192                    | Biopsy                      | ND            | ND                | L parieto-occipital, splenium of CC  | Supra               | No | 6         |
| Haegelle-Link | 2006 | 6       | 68         | ND  | ND                                                       | ND            | 0                      | ND                          | ND            | ND                | ND                                   | ND                  | ND | ND        |
| De Raedt      | 2007 | 7       | 43         | M   | Lung, bone marrow, uvea, spleen, thoracic LAD, hilar LAD | CS (4 months) | 0                      | Biopsy                      | CDF           | 88                | R parietal and occipital             | Supra               | No | ND        |
| Goldbecker    | 2010 | 8       | 50         | F   | Lung                                                     | CS            | 240                    | Biopsy                      | ND            | ND                | L fronto-temporal                    | Supra               | No | 4         |
| Yagi          | 2010 | 9       | 34         | M   | Lung, uvea, skin, parotids                               | CS, CYC       | 156                    | Biopsy and CSF              | CDF           | Normal            | R frontal and parietal               | Supra               | No | ND        |
| Hohlfeld      | 2012 | 10      | 39         | M   | Lung, spleen, bone marrow, mediastinal LAD               | ND            | 0                      | CSF                         | ND            | 171               | R temporal and occipital, R thalamus | Supra               | No | ND        |
| Davis         | 2013 | 11      | ND         | F   | Lung, heart, mediastinum                                 | ND            | 0                      | Biopsy (CSF obtained later) | ND            | 627               | L parieto-occipital and R temporal   | Supra               | No | ND        |
| Matsudaira    | 2014 | 12      | 60         | M   | Hepatic and supraclavicular LNs                          | CS            | 480                    | Biopsy                      | MFQ, MTZ      | ND                | R frontal and temporoparietal        | Supra               | ND | 3         |
| Jamilloux*    | 2014 | 13      | 41         | M   | Lung, mediastinum                                        | CS            | 0                      | Biopsy                      | CTB, MTZ      | 354               | ND                                   | ND                  | No | ND        |
|               |      | 14      | 41         | M   | Lung, mediastinum                                        | CS            | 0                      | Biopsy                      | CTB, MTZ      | 354               | ND                                   | ND                  | No | ND        |

|                    |      |    |            |   |                                       |         |     |                             |               |           |                                      |       |     |    |
|--------------------|------|----|------------|---|---------------------------------------|---------|-----|-----------------------------|---------------|-----------|--------------------------------------|-------|-----|----|
| <b>Galdys</b>      | 2016 | 15 | 48         | M | Lung, Skin                            | CS, INF | ND  | Biopsy                      | MTZ           | ND        | L thalamus, temporal lobe            | Supra | No  | 6  |
| <b>Ellrichmann</b> | 2016 | 16 | 38         | M | Lung, retroperitoneal LAD             | CS      | 0   | CSF                         | MTZ, MFQ, CDF | 92        | L frontal and parietal               | Supra | No  | ND |
| <b>Hellouin</b>    | 2016 | 17 | 77         | F | Lung, kidneys, mediastinal LAD        | ND      | 60  | CSF                         | NR            | 311       | L frontal and parietal               | Supra | No  | 3  |
| <b>Scholten</b>    | 2017 | 18 | 57         | M | Mediastinum and hilar lymphadenopathy | ND      | 0   | CSF                         | MTZ           | ND        | ND                                   | ND    | No  | 6  |
| <b>Gamperl</b>     | 2018 | 19 | 76         | F | Lung, mediastinal LAD                 | ND      | 24  | CSF                         | MTZ           | ND        | B/L frontal and temporal lobes       | Supra | Yes | 3  |
|                    |      | 20 | 54         | F | Lung                                  | CS, CYC | 72  | Biopsy                      | MTZ, MFQ      | ND        | L frontal, R parietal, B/L occipital | Supra | No  | 4  |
|                    |      | 21 | 63         | F | Lung, bone marrow                     | ND      | 0   | CSF                         | ND            | Decreased | R frontoparietal                     | Supra | No  | 6  |
| <b>Alstadhaug</b>  | 2020 | 22 | 78         | F | Lung, mediastinum, abdomen            | CS      | 300 | CSF                         | MTZ, rhIL-7   | 245       | B/L subcortical lesions              | Supra | No  | ND |
| <b>Elbadri</b>     | 2020 | 23 | 49         | M | Lung, uvea, LAD                       | CS      | 0   | CSF                         | ND            | ND        | L parieto-occipital and temporal     | Supra | No  | 6  |
| <b>Guffroy</b>     | 2020 | 24 | 45         | M | Lung                                  | CS, HCQ | 3   | CSF                         | IL-7          | 120       | L>R frontoparietal                   | Supra | No  | 5  |
| <b>Dohrn</b>       | 2021 | 25 | 5th decade | M | ND                                    | CS      | 0   | CSF                         | MTZ, MFQ      | 106       | L occipital                          | Supra | No  | ND |
|                    |      | 26 | 6th decade | M | ND                                    | CS      | ND  | Biopsy (CSF obtained later) | MTZ, MFQ      | 464       | R parietooccipital                   | Supra | No  | 6  |
|                    |      | 27 | 6th decade | M | ND                                    | CS      | 0   | CSF                         | MTZ, MFQ      | 404       | L frontal and B/L parietal           | Supra | No  | 6  |
|                    |      | 28 | 7th decade | F | ND                                    | CS      | ND  | Biopsy (CSF obtained later) | MTZ, MFQ, CDF | 382       | R parietal, temporal, occipital      | Supra | No  | ND |

|                   |      |    |            |    |                                                              |         |    |                                        |               |     |                                                                  |       |     |       |
|-------------------|------|----|------------|----|--------------------------------------------------------------|---------|----|----------------------------------------|---------------|-----|------------------------------------------------------------------|-------|-----|-------|
|                   |      | 29 | 4th decade | M  | ND                                                           | CS      | 0  | CSF                                    | MTZ, MFQ, CDF | 132 | L parietal, frontal, occipital                                   | Supra | No  | ND    |
| <b>Graf</b>       | 2021 | 30 | ND         | ND | ND                                                           | ND      | ND | ND                                     | ND            | ND  | ND                                                               | ND    | ND  | 6     |
|                   |      | 31 | ND         | ND | ND                                                           | ND      | ND | ND                                     | ND            | ND  | ND                                                               | ND    | ND  | ND    |
| <b>Patel</b>      | 2021 | 32 | 35         | M  | Lung, portal, LNs in left para-aortic and aortocaval regions | CS, MTX | 5  | ND                                     | MTZ, MFQ, PEM | 106 | R vermis and cerebellar peduncle, B/L frontoparietal, L temporal | Infra | No  | 5     |
| <b>Primicerio</b> | 2021 | 33 | 60         | M  | ND                                                           | CS      | ND | ND                                     | MTZ           | ND  | B/L frontal                                                      | Supra | No  | 6     |
| <b>Rosenkranz</b> | 2022 | 34 | 48         | M  | ND                                                           | ND      | 15 | Biopsy                                 | IFX           | 140 | Parieto-occipital                                                | Supra | No  | ND    |
|                   |      | 35 | 49         | M  | ND                                                           | ND      | 0  | Ataxia, dysarthria<br>Apraxia, aphasia | IFX           | 165 | Parieto-occipital                                                | Supra | Yes | Alive |
|                   |      | 36 | 63         | M  | ND                                                           | ND      | 7  | ND                                     | IFX           | 205 | Cerebellum, pons, medulla                                        | Infra | No  | Alive |
|                   |      | 37 | 55         | M  | ND                                                           | ND      | 0  | ND                                     | IFX           | 231 | Thalamus, internal capsule, precentral gyrus                     | Supra | No  | Alive |

AZA: Azathioprine; B/L: Bilateral; CDF: Cidofovir; CE: Contrast enhancement; CS: Corticosteroids; CTB: Cytarabine; CYC: Cyclophosphamide; HCQ: Hydroxychloroquine; IFX: Infliximab; NSO: Neurologic symptom onset; L: Left; MFQ: Mefloquine; MTX: Methotrexate; MTZ: Mirtazapine; PEM: Pembrolizumab; R: Right

\*Four patients were documented as having cerebellar involvement, although unspecified whether they also showed supratentorial involvement.

\*\*Corticosteroids increased 3 months prior to NSO

†Corticosteroids started 3 weeks prior to NSO
