# Supplementary material
Source: PubMed Central journal article supplement (PMC10126944)
Supplement: jamaneurol-e230841-s002.pdf [file jamaneurol-e230841-s002.pdf]

## Data Sharing Statement

McEntire. Progressive Multifocal Leukoencephalopathy Associated With Sarcoidosis Without Therapeutic Immune Suppression. *JAMA Neurol.* Published April 24, 2023.

doi:10.1001/jamaneurol.2023.0841

### Data

**Data available:** Yes

**Data types:** Deidentified participant data

**How to access data:** Please e-mail [cmcentire@mgh.harvard.edu](mailto:cmcentire@mgh.harvard.edu) with requests for data sharing.

**When available:** With publication

### Supporting Documents

**Document types:** None

### Additional Information

**Who can access the data:** Data will be shared upon reasonable request by qualified investigators and subject to any relevant ethics board approvals.

**Types of analyses:** Data will be made available for any reasonable purpose.

**Mechanisms of data availability:** Signed data access agreement will be required.
